# Supplementary material
Source: PubMed Central journal article supplement (PMC3315157)
Supplement: NIHMS362753-supplement-1_si_001.pdf [file NIHMS362753-supplement-1_si_001.pdf]

Supplementary Figure S1

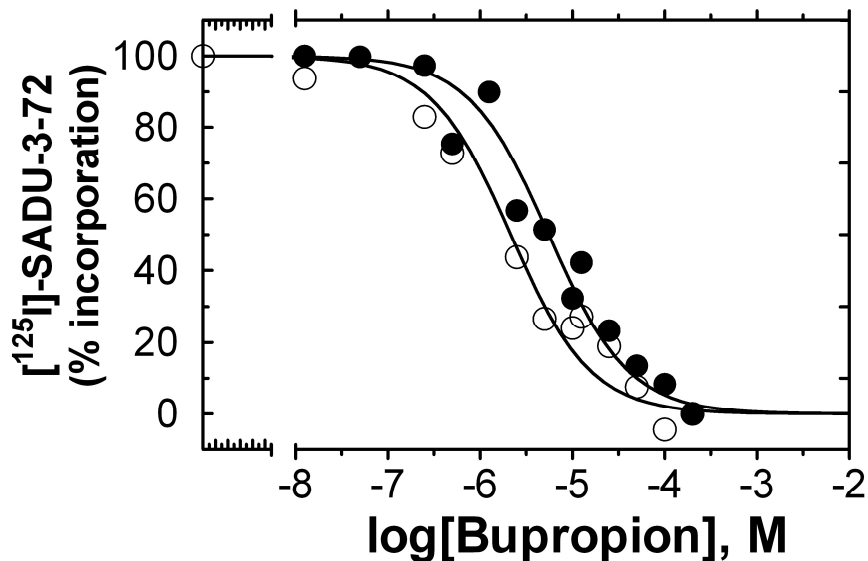

**S1: Bupropion inhibition of [<sup>125</sup>I]-SADU-3-72 photoincorporation into the  $\delta$ -subunit of the *Torpedo* nAChR in the absence or presence of the agonist carbamylcholine.** *Torpedo* nAChR-rich membranes (~55  $\mu$ g) were photolabeled with 0.2 nM [<sup>125</sup>I]-SADU-3-72 (irradiated at 365 nm for 10 min) in the absence (●) or presence (○) of 400  $\mu$ M Carb and in the presence of increasing concentrations (0  $\mu$ M – 200  $\mu$ M) of bupropion. nAChR subunits were resolved in an 8% SDS-polyacrylamide gel, stained, dried and processed to develop an autoradiograph (not shown). <sup>125</sup>I incorporation into the  $\delta$ -subunit was determined by gamma-counting of excised gel bands after autoradiography. Normalized values for bupropion inhibition of  $\delta$ -subunit labeling (●,  $IC_{50} = 5.5 \pm 0.7 \mu$ M; ○,  $IC_{50} = 2.1 \pm 0.7 \mu$ M) were fit to a one-site model. Total  $\delta$  subunit <sup>125</sup>I incorporation was 640 (●) and 230 cpm (○) and non-specific labeling in presence of 200  $\mu$ M bupropion was 80 (●) and 70 cpm (○).

Supplementary Figure S2

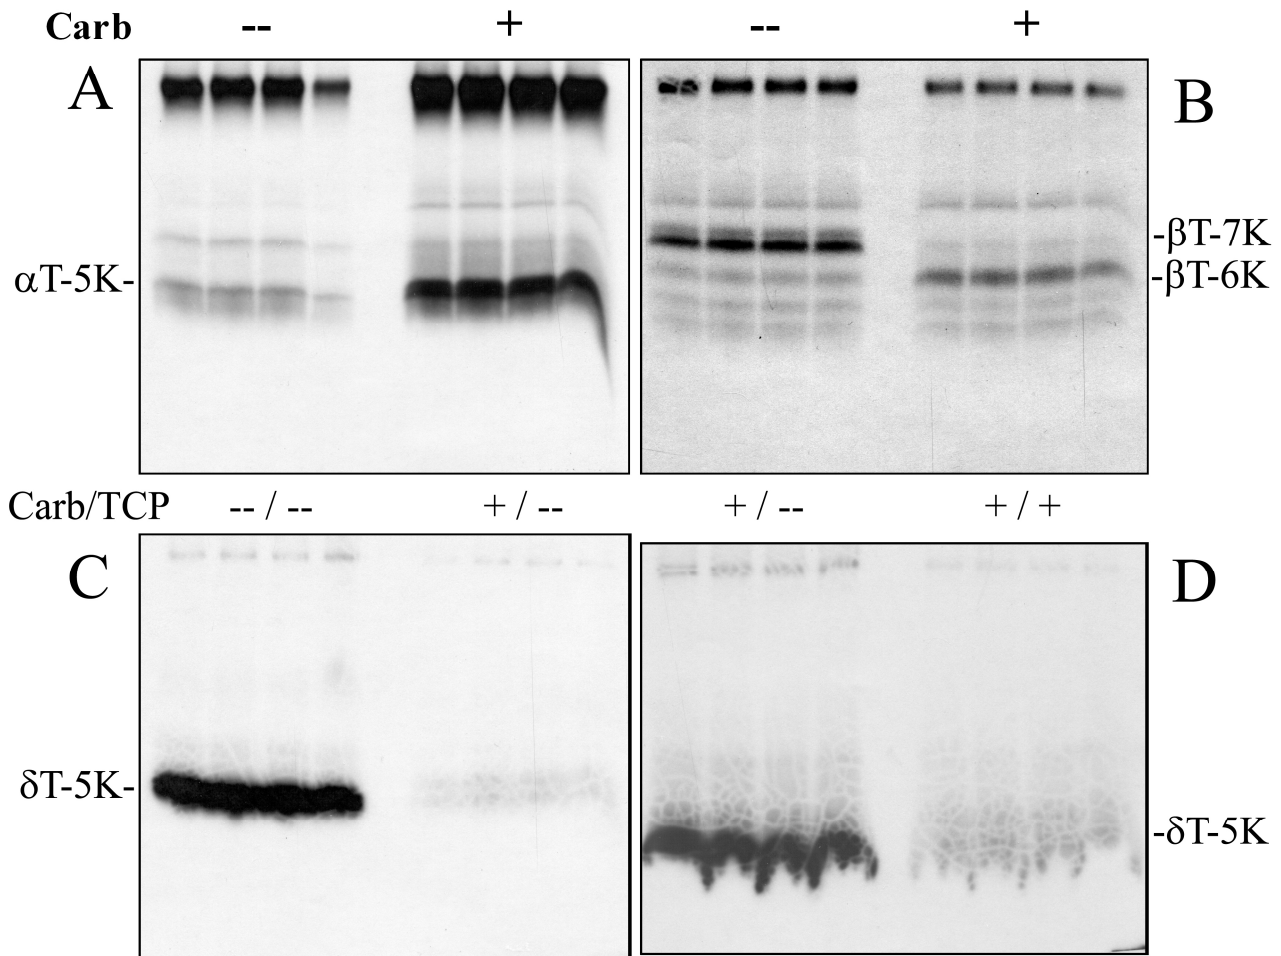

S2. Tricine SDS-PAGE separation of tryptic digests of [ $^{125}$ I]-SADU-3-72-photolabeled fragments  $\alpha$ V8-20K,  $\beta$ V8-22K, and  $\delta$ V8-14K isolated from purified *Torpedo* nAChR (A-C, +  $\alpha$ -BgTx or + Carb) or nAChR-rich membranes in the desensitized state (+Carb, – or + TCP). *Torpedo* nAChRs were photolabeled with [ $^{125}$ I]-SADU-3-72 (7 nM (A-C) or 15 nM (D)). The  $\alpha$ ,  $\beta$  and  $\delta$  subunits were isolated from an 8% SDS-PAGE gel and digested ‘in-gel’ with V8 protease, as detailed in Experimental Procedures. The labeled fragments  $\alpha$ V8-20K,  $\beta$ V8-22K, and  $\delta$ V8-14K were isolated and further digested with trypsin. Material from each tryptic

digest was then resolved on 1.0 mm thick small pore (16.5%T/6%C) Tricine SDS-PAGE gels (1, 2). After Coomassie Blue R-250 staining (1 h) and destaining (3-4 h), Tricine gels were dried and exposed to film (8-12 h). The  $^{125}\text{I}$ -containing bands ( $\alpha\text{T5K}$ ,  $\beta\text{T7K}$ , and  $\delta\text{T5K}$ ) were excised from the Tricine gels and labeled material was isolated for reversed-phase HPLC purification ( $\alpha\text{T5K}$ , Fig. 8A;  $\beta\text{T7K}$ , Fig. 6B;  $\delta\text{T5K}$ , Fig. 6A and 7A) and subsequent sequence analysis.

Supplementary Figure S3

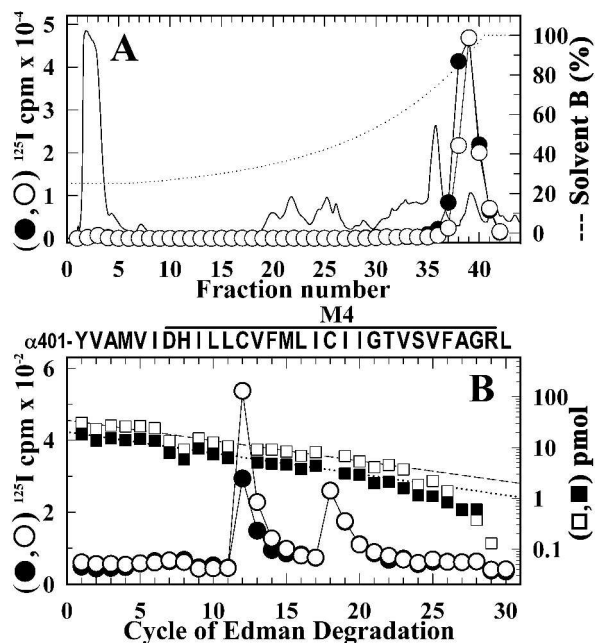

**S3. Identification of amino acids photolabeled by [ $^{125}\text{I}$ ]-SADU-3-72 in the *Torpedo* nAChR  $\alpha\text{M4}$  segment.** From the photolabeling experiment of Figures 6,  $\alpha$  subunits were isolated from purified *Torpedo* nAChR photoabeled with [ $^{125}\text{I}$ ]-SADU-3-72 in the presence of  $\alpha$ -BgTx (●, ■) or presence of Carb (○, □) and digested 'in-gel' with V8 protease. The labeled fragment  $\alpha\text{V8-10K}$  was isolated and further digested with trypsin. **A)** Reversed-phase HPLC fractionation of the [ $^{125}\text{I}$ ]-SADU-3-72-labeled tryptic digest of  $\alpha\text{V8-10K}$ . The elution of peptides was monitored by absorbance at 210 nm (solid line), and  $^{125}\text{I}$  elution was quantified by  $\gamma$  counting of each fraction (●, ○). **B,**  $^{125}\text{I}$  (●, ○) and PTH-amino acids (■, □) released during amino acid sequence analysis of  $^{125}\text{I}$  peak (fractions 38-40; ●, 60,000 cpm; ○, 40,000 cpm) from **A**. In each sample, the primary peptide detected began at  $\alpha\text{Tyr}^{401}$  (●,  $l_0 = 20 \pm 1$  pmol,  $R = 91\%$ ; ○,  $l_0 = 35 \pm 2$  pmol,  $R = 91\%$ ) and for both samples there were peaks of  $^{125}\text{I}$  cpm

release in cycles 12 and 18 corresponding to labeling of  $\alpha\text{Cys}^{412}$  (●, 8 cpm/pmol; ○, 9 cpm/pmol) and  $\alpha\text{Cys}^{418}$  (●, 10 cpm/pmol; ○, 6 cpm/pmol).

#### References:

1. Blanton, M. P., and Cohen, J. B. (1994) Identifying the lipid-protein interface of the Torpedo nicotinic acetylcholine receptor: secondary structure implications, *Biochemistry* 33, 2859-2872.
2. Schagger, H., and von Jagow, G. (1987) Tricine-sodium dodecyl sulfate-polyacrylamide gel electrophoresis for the separation of proteins in the range from 1 to 100 kDa, *Anal Biochem* 166, 368-379.
